# Supplementary material for: Polyphenols from Blue Honeysuckle (<em>Lonicera caerulea</em> L. var. <em>edulis</em>) Berry Inhibit Lipid Accumulation in Adipocytes by Suppressing Lipogenesis
Source: Preprints.org preprint supplement (doi:10.20944/preprints202101.0484.v1), 2021-01-25
Supplement: Supplementary file 1 [file supplementary]

**Table S1.** The polyphenolic compounds detected in BHBE.

| **No. #** | **Compound** | **Retention time (s)** | **m/z** |
| --- | --- | --- | --- |
| 1 | Chlorogenic acid | 146.34 | 353.0874 |
| 2 | Cyanidin-3-glucoside | 443.77 | 447.0928 |
| 3 | Quercetin | 274.44 | 301.0344 |
| 4 | Astragalin | 180.62 | 449.1063 |
| 5 | Peonidin-3-glucoside | 191.54 | 463.1227 |
| 6 | Kaempferol | 180.87 | 287.0533 |
| 7 | Isorhamnetin | 188.58 | 315.0509 |
| 8 | Biorobin | 181.12 | 595.1632 |
| 9 | Panasenoside | 163.11 | 611.1572 |
| 10 | Peonidin-3-sophoroside | 173.22 | 625.1730 |
| 11 | Cosmosiin | 188.27 | 433.1121 |
| 12 | Neochlorogenic acid | 161.68 | 353.0875 |
| 13 | Luteolin-7-glucoside | 224.07 | 447.0929 |
| 14 | Kaempferide | 190.90 | 301.0683 |
| 15 | Myricetin | 164.50 | 317.0304 |
| 16 | Kaempferol-3-arabinoside | 192.98 | 419.0959 |
| 17 | Isoquercitrin | 222.00 | 465.1023 |
| 18 | Diosmetin-7-neohesperidoside | 191.25 | 609.1790 |
| 19 | Morusin | 171.46 | 421.1670 |
| 20 | Epicatechin | 189.37 | 289.0716 |
| 21 | Rutin | 213.01 | 609.1458 |
| 22 | Paeonoside | 145.28 | 327.1082 |
| 23 | Multinoside A | 216.45 | 611.1572 |
| 24 | Chrysoeriol | 226.59 | 301.0699 |
| 25 | Quercetin-4-glucoside | 239.02 | 463.0877 |
| 26 | Cycloartocarpin | 168.17 | 435.1823 |
| 27 | Luteolin | 271.52 | 285.0402 |
| 28 | Limocitrin | 52.66 | 345.0593 |
| 29 | Tamarixetin | 242.77 | 317.0643 |
| 30 | Procyanidin B1 | 178.09 | 577.1348 |
| 31 | Cynarin | 196.96 | 515.1190 |
| 32 | Eriodictyol | 263.46 | 287.0499 |
| 33 | Amentoflavone | 273.92 | 537.0824 |
| 34 | Phlorizin | 242.58 | 435.1295 |
| 35 | Genistein | 160.94 | 269.0428 |
| 36 | Isochlorogenic acid C | 35.07 | 515.1243 |

# The compounds are ranked by their relative content in BHBE.
